# Supplementary material for: Cation permeability in CorA family of proteins
Source: PubMed Central journal article supplement (PMC6972854; doi:10.1038/s41598-020-57869-z), 2020-01-21
Supplement: 41598_2020_57869_MOESM1_ESM.pdf [file 41598_2020_57869_MOESM1_ESM.pdf]

## **Cation permeability in CorA family of proteins**

Artem Stetsenko, Albert Guskov

## Supplementary Figure 1

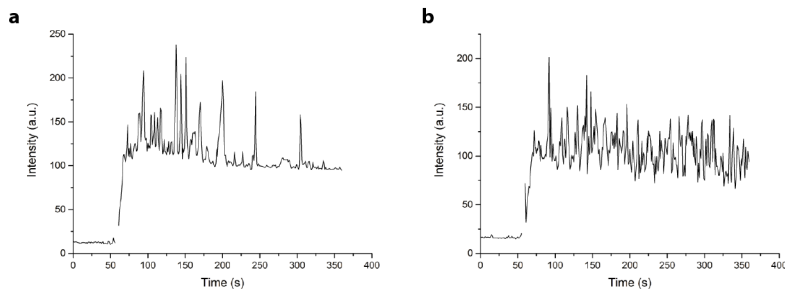

Collapse of proteoliposomes with (a) TmCorA (b) MjCorA under addition of  $> 200 \mu\text{M}$  Hexamminecobalt(III) chloride as seen from the instability of the fluorescence time course.

## Supplementary Figure 2

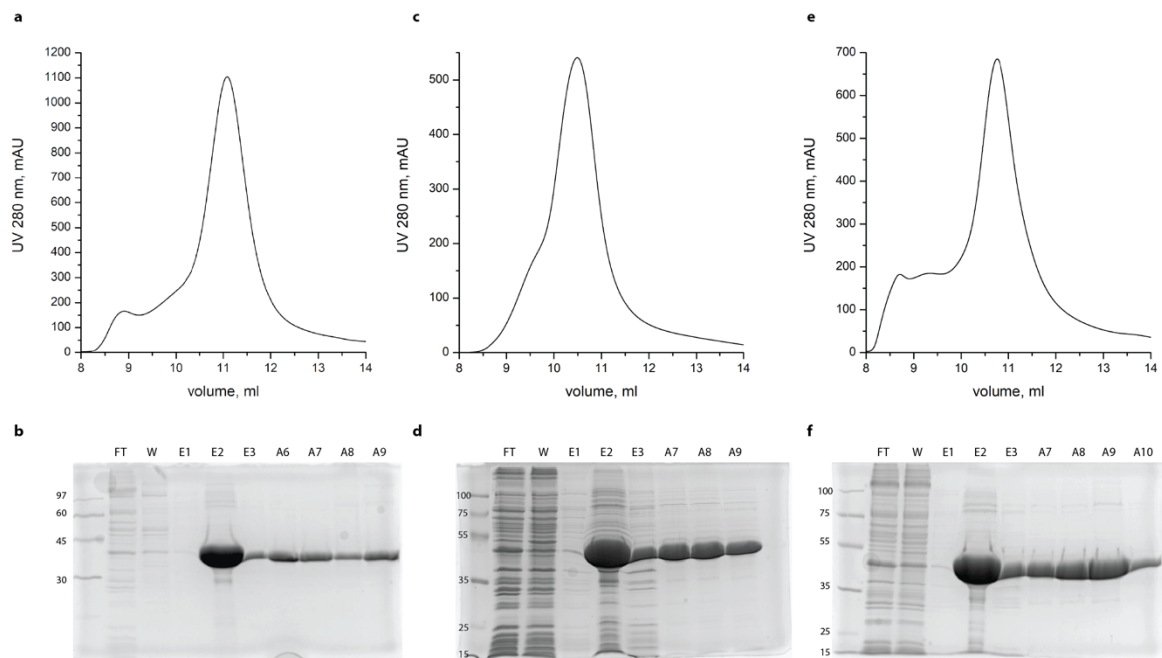

Protein purification. Size-exclusion chromatography profiles and the corresponding SDS-PAGE gels of (a-b) EcZntB, (c-d) TmCorA and (e-f) MjCorA. Please note different markers in SDS-PAGE gels were used for ZntB and CorA proteins. Only fraction A8 was used for experiments.
